# Supplementary material
Source: MDPI journal article supplement (https://www.mdpi.com/2071-1050/13/16/9312)
Supplement: s1 [file s1 › Supplementary file.pdf]

## Decomposition of direct CO<sub>2</sub> emissions from direct and indirect demand

The direct CO<sub>2</sub> releases can be decomposed into the emissions embedded in a sector's internal use (direct demand) of its own products and services. And the direct emissions embedded in the other sectors purchases form a target sector. As can be seen from Fig S1, for all five nations the CO<sub>2</sub> emissions from intra-sectoral use driven by direct demand were significantly larger than those embedded in downstream emissions driven by the indirect demand. For China, India, Indonesia and Pakistan the highest amount of both the internal and downstream emissions were from the sector of MUC. For Bangladesh the largest amount of internal emissions was from MUC, while the biggest amount of forward emissions was from the sector of BTPS.

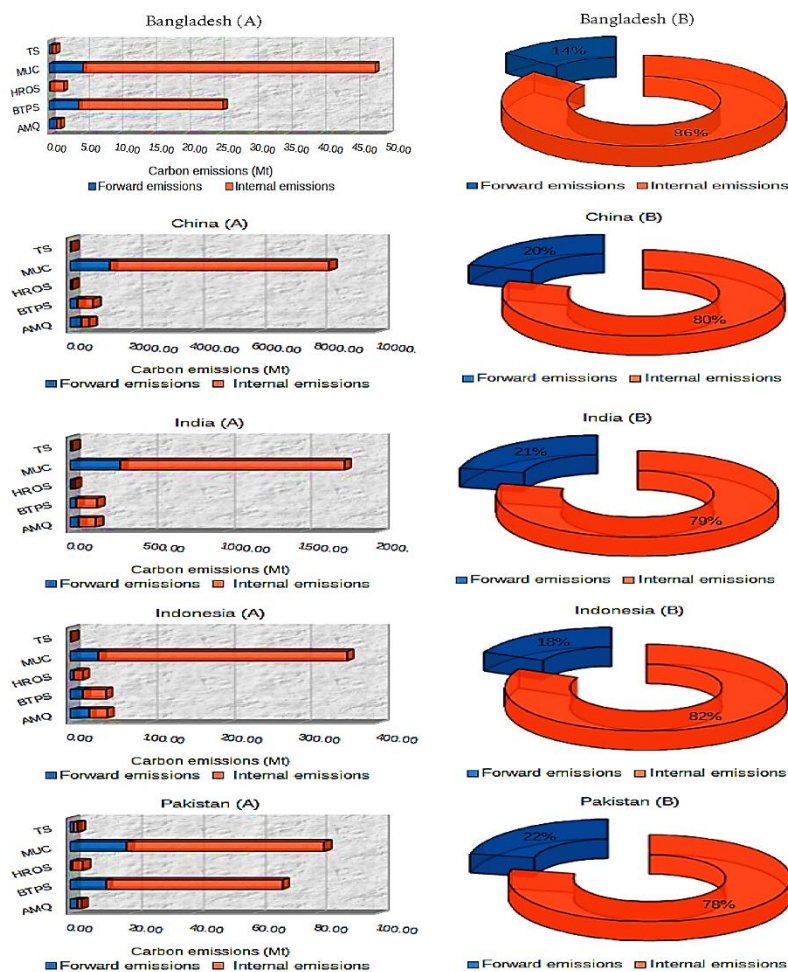

**Figure S1.** The direct CO<sub>2</sub> emissions from direct and indirect demand.
