# Supplementary material
Source: MDPI journal article supplement (https://www.mdpi.com/2071-1050/13/16/9312)
Supplement: s1 [file s1 › Table S2.pdf]

**Table S2.** The aggregation of China's national input-output table.

|                                                                     |
|---------------------------------------------------------------------|
| <b>Agriculture, Mining and Quarrying</b>                            |
| Crop cultivation                                                    |
| Forestry                                                            |
| Logging and transport of timber and bamboo                          |
| Livestock and livestock products                                    |
| Fishery                                                             |
| Technical services for agriculture, forestry, livestock and fishing |
| Coal mining and processing                                          |
| Crude petroleum products and Natural gas products                   |
| Ferrous ore mining                                                  |
| Non-ferrous ore mining                                              |
| Salt mining                                                         |
| Non-metal minerals and other mining                                 |
| <b>Business, Trade, Personal, and Public Services</b>               |
| Post                                                                |
| Telecommunication                                                   |
| Computing services and software                                     |
| Wholesale and retail trade                                          |
| Scientific research                                                 |
| General technical services                                          |
| Geological prospecting                                              |
| Water conservancy                                                   |
| Environmental resources and public infrastructure                   |
| Resident services and other services                                |
| Educational services                                                |
| Health services                                                     |
| Social welfare                                                      |
| Culture and arts, radio, film and television                        |
| Sports                                                              |
| Recreational services                                               |
| Public administration and other sectors                             |
| Warehousing                                                         |
| Finance                                                             |
| Insurance                                                           |
| Real estate                                                         |
| Leasehold                                                           |
| Business services                                                   |
| Tourism                                                             |
| Re-export & Re-import                                               |
| <b>Hotel and restaurants and Other Personal Services</b>            |
| Hotels                                                              |
| Eating and drinking places                                          |
| <b>Light/Heavy Manufacturing, Utilities, and Construction</b>       |
| Grain mill products                                                 |
| Feeding stuff production and processing                             |

---

Vegetable oil and forage  
Sugar refining  
Slaughtering , meat processing, eggs and dairy products  
Prepared fish and seafood  
Other food products  
Wines, spirits and liquors  
Non-alcoholic beverage  
Tobacco products  
Cotton textiles  
Woolen textiles  
Hemp textiles  
Other textiles not elsewhere classified  
Knitted mills  
Wearing apparel  
Leather, furs, down and related products  
Sawmills and fibreboard  
Furniture and products of wood, bamboo, cane, palm, straw, etc.  
Paper and products  
Printing and record medium reproduction  
Cultural goods  
Toys, sporting and athletic and recreation products  
Petroleum refining  
Coking  
Raw chemical materials  
Chemical fertilizers  
Chemical pesticides  
Chemicals for painting, dying and others  
Synthetic chemicals  
Chemicals for special usages  
Chemical products for daily use  
Medical and pharmaceutical products  
Chemical fibers  
Rubber products  
Plastic products  
Cement and cement asbestos products  
Glass and glass products  
Pottery, china and earthenware  
Fireproof products  
Other non-metallic mineral products  
Iron-smelting  
Steel-smelting  
Steel-processing  
Alloy iron smelting  
Nonferrous metal smelting  
Nonferrous metal processing  
Metal products  
Boiler, engines and turbine

---

---

Metalworking machinery  
Other general industrial machinery  
Agriculture, forestry, animal husbandry and fishing machinery  
Other special industrial equipment  
Railroad transport equipment  
Motor vehicles  
Vehicles fittings production  
Ship building  
Other transport machinery  
Generators  
Household electric appliances  
Other electric machinery and equipment  
Communication equipment  
Electronic computer  
Other computer devices  
Electronic element and device  
Electronic appliances  
Other electronic and communication equipment  
Instruments, meters and other measuring equipment  
Cultural and office equipment  
Arts and crafts products  
Other manufacturing products  
Scrap and waste  
Electricity and steam production and supply  
Gas production and supply  
Water production and supply  
Construction

---

### **Transport services**

---

Railway passenger transport  
Railway freight transport  
Highway freight and passengers transport  
Domestic public transport  
Water freight and passengers transport  
Air passenger transport  
Air freight transport  
Pipeline transport

---
