# Supplementary material
Source: MDPI journal article supplement (https://www.mdpi.com/2071-1050/13/16/9312)
Supplement: s1 [file s1 › Table S3.pdf]

**Table S3.** The aggregation of India's national input-output table.

| <b>Agriculture, Mining and Quarrying</b>              |                               |
|-------------------------------------------------------|-------------------------------|
|                                                       | Paddy                         |
|                                                       | Wheat                         |
|                                                       | Jowar                         |
|                                                       | Bajra                         |
|                                                       | Maize                         |
|                                                       | Gram                          |
|                                                       | Pulses                        |
|                                                       | Sugarcane                     |
|                                                       | Groundnut                     |
|                                                       | Jute                          |
|                                                       | Cotton                        |
|                                                       | Tea                           |
|                                                       | Coffee                        |
|                                                       | Rubber                        |
|                                                       | Coconut                       |
|                                                       | Tobacco                       |
|                                                       | Other crops                   |
|                                                       | Milk and milk products        |
|                                                       | Animal services(agricultural) |
|                                                       | Other livestock products      |
|                                                       | Forestry and logging          |
|                                                       | Fishing                       |
|                                                       | Coal and lignite              |
|                                                       | Crude petroleum, natural gas  |
|                                                       | Iron ore                      |
|                                                       | Manganese ore                 |
|                                                       | Bauxite                       |
|                                                       | Copper ore                    |
|                                                       | Other metallic minerals       |
|                                                       | Lime stone                    |
|                                                       | Mica                          |
|                                                       | Other non metallic minerals   |
| <b>Business, Trade, Personal, and Public Services</b> |                               |
|                                                       | Trade                         |
|                                                       | Banking                       |
|                                                       | Insurance                     |
|                                                       | Ownership of dwellings        |
|                                                       | Education and research        |
|                                                       | Medical and health            |
|                                                       | Public administration         |
|                                                       | Storage and warehousing       |
|                                                       | Communication                 |
|                                                       | Re-import                     |

---

## **Hotel and restaurants and Other Personal Services**

---

Hotels and restaurants

Other services

---

## **Light/Heavy Manufacturing, Utilities, and Construction**

---

Sugar

Khandsari, boora

Hydrogenated oil(vanaspati)

Edible oils other than vanaspati

Tea and coffee processing

Miscellaneous food products

Beverages

Tobacco products

Khadi, cotton textiles(handlooms)

Cotton textiles

Woolen textiles

Silk textiles

Art silk, synthetic fiber textiles

Jute, hemp, mesta textiles

Carpet weaving

Readymade garments

Miscellaneous textile products

Furniture and fixtures-wooden

Wood and wood products

Paper, paper prods. & newsprint

Printing and publishing

Leather footwear

Leather and leather products

Rubber products

Plastic products

Petroleum products

Coal tar products

Inorganic heavy chemicals

Organic heavy chemicals

Fertilizers

Pesticides

Paints, varnishes and lacquers

Drugs and medicines

Soaps, cosmetics & glycerin

Synthetic fibers, resin

Other chemicals

Structural clay products

Cement

Other non-metallic mineral prods.

Iron, steel and ferro alloys

Iron and steel casting & forging

Iron and steel foundries

---

---

Non-ferrous basic metals  
Hand tools, hardware  
Miscellaneous metal products  
Tractors and agri. implements  
Industrial machinery(F & T)  
Industrial machinery(others)  
Machine tools  
Office computing machines  
Other non-electrical machinery  
Electrical industrial Machinery  
Electrical wires & cables  
Batteries  
Electrical appliances  
Communication equipments  
Other electrical Machinery  
Electronic equipments(incl.TV)  
Ships and boats  
Rail equipments  
Motor vehicles  
Motor cycles and scooters  
Bicycles, cycle-rickshaw  
Other transport equipments  
Watches and clocks  
Miscellaneous manufacturing  
Construction  
Electricity  
Gas  
Water supply

---

### **Transport services**

---

Railway transport services  
Other transport services

---
