# Supplementary material
Source: MDPI journal article supplement (https://www.mdpi.com/2071-1050/13/16/9312)
Supplement: s1 [file s1 › Table S4.pdf]

**Table S4.** The aggregation of Indonesia's national input-output table.

| <b>Agriculture, Mining and Quarrying</b>                      |
|---------------------------------------------------------------|
| Paddy                                                         |
| Other grain                                                   |
| Food crops                                                    |
| Non-food crops                                                |
| Livestock and poultry                                         |
| Forestry                                                      |
| Fishery                                                       |
| Crude petroleum and natural gas                               |
| Iron ore                                                      |
| Other metallic ore                                            |
| Non-metallic ore and quarrying                                |
| <b>Business, Trade, Personal, and Public Services</b>         |
| Wholesale and retail trade                                    |
| Telephone and telecommunication                               |
| Finance and insurance                                         |
| Real estate                                                   |
| Education and research                                        |
| Medical and health service                                    |
| Unclassified                                                  |
| Public administration                                         |
| Re-export                                                     |
| <b>Hotel and restaurants and Other Personal Services</b>      |
| Restaurants                                                   |
| Hotel                                                         |
| Other services                                                |
| <b>Light/Heavy Manufacturing, Utilities, and Construction</b> |
| Milled grain and flour                                        |
| Fish products                                                 |
| Slaughtering, meat products and dairy products                |
| Other food products                                           |
| Beverage                                                      |
| Tobacco                                                       |
| Spinning                                                      |
| Weaving and dyeing                                            |
| Knitting                                                      |
| Wearing apparel                                               |
| Other made-up textile products                                |
| Leather and leather products                                  |
| Timber                                                        |
| Wooden furniture                                              |
| Other wooden products                                         |
| Pulp and paper                                                |
| Printing and publishing                                       |
| Synthetic resins and fiber                                    |
| Basic industrial chemicals                                    |
| Chemical fertilizers and pesticides                           |
| Drugs and medicine                                            |

---

Other chemical products  
Refined petroleum and its products  
Plastic products  
Tires and tubes  
Other rubber products  
Cement and cement products  
Glass and glass products  
Other non-metallic mineral products  
Iron and steel  
Non-ferrous metal  
Metal products  
Boilers, Engines and turbines  
General machinery  
Metal working machinery  
Specialized machinery  
Heavy Electrical equipment  
Television sets, radios, audios and communication equipment  
Electronic computing equipment  
Semiconductors and integrated circuits  
Other electronics and electronic products  
Household electrical equipment  
Lighting fixtures, batteries, wiring and others  
Motor vehicles  
Motor cycles  
Shipbuilding  
Other transport equipment  
Precision machines  
Other manufacturing products  
Electricity and gas  
Water supply  
Building construction  
Other construction

---

## **Transport services**

---

Transportation

---
