# Supplementary material
Source: MDPI journal article supplement (https://www.mdpi.com/2071-1050/13/16/9312)
Supplement: s1 [file s1 › Table S5.pdf]

**Table S5.** The aggregation of Pakistan's national input-output table.

|                                                               |
|---------------------------------------------------------------|
| <b>Agriculture, Mining and Quarrying</b>                      |
| Agriculture                                                   |
| Fishing                                                       |
| Mining and Quarrying                                          |
| <b>Business, Trade, Personal, and Public Services</b>         |
| Maintenance and Repair                                        |
| Wholesale Trade                                               |
| Retail Trade                                                  |
| Post and Telecommunications                                   |
| Financial Intermediation and Business Activities              |
| Public Administration                                         |
| Education, Health and Other Services                          |
| Private Households                                            |
| Re-export & Re-import                                         |
| <b>Hotel and restaurants and Other Personal Services</b>      |
| Hotels and Restaurants                                        |
| Others                                                        |
| <b>Light/Heavy Manufacturing, Utilities, and Construction</b> |
| Food & Beverages                                              |
| Textiles and Wearing Apparel                                  |
| Wood and Paper                                                |
| Petroleum, Chemical and Non-Metallic Mineral Products         |
| Metal Products                                                |
| Electrical and Machinery                                      |
| Transport Equipment                                           |
| Other Manufacturing                                           |
| Recycling                                                     |
| Electricity, Gas and Water                                    |
| Construction                                                  |
| <b>Transport services</b>                                     |
| Transport services                                            |
